# Supplementary material
Source: PubMed Central journal article supplement (PMC3985068)
Supplement: NIHMS56161-supplement-Extended_data_table_1.pdf [file NIHMS56161-supplement-Extended_data_table_1.pdf]

| species (N)       | <i>Apis</i> (250) | <i>B.ter</i> (170) | <i>B.luc</i> (60) | <i>B.lap</i> (175) | <i>B.pas</i> (60) | <i>B.hor</i> (20) | <i>B.mon</i> (10) |
|-------------------|-------------------|--------------------|-------------------|--------------------|-------------------|-------------------|-------------------|
| DWV present       | 36 [30, 43]       | 9 [5, 14]          | 18 [9, 29]        | 16 [11, 23]        | 4 [1, 12]         | 0 [0, 17]         | 11 [1, 47]        |
| DWV replicating   | 88 [70, 98]*      | 1 [0, 3]           | 4 [1, 12]         | 10 [6, 15]         | 0 [0, 6]          | 0 [0, 17]         | 11 [1, 47]        |
| <i>N. ceranae</i> | 9 [6, 13]         | 2 [1, 6]           | 0 [0, 6]          | 16 [11, 23]        | 0 [0, 6]          | 5 [0, 25]         | 0 [0, 29]         |
| single infection  | 18 [14, 23]       | 3 [1, 7]           | 3 [1, 12]         | 20 [14, 27]        | 0 [0, 6]          | 5 [0, 25]         | 11 [1, 47]        |
| co-infection      | 1 [0, 3]          | 0 [0, 2]           | 0 [0, 6]          | 3 [1, 7]           | 0 [0, 6]          | 0 [0, 17]         | 0 [0, 29]         |
