# Supplementary material
Source: PubMed Central journal article supplement (PMC3985068)

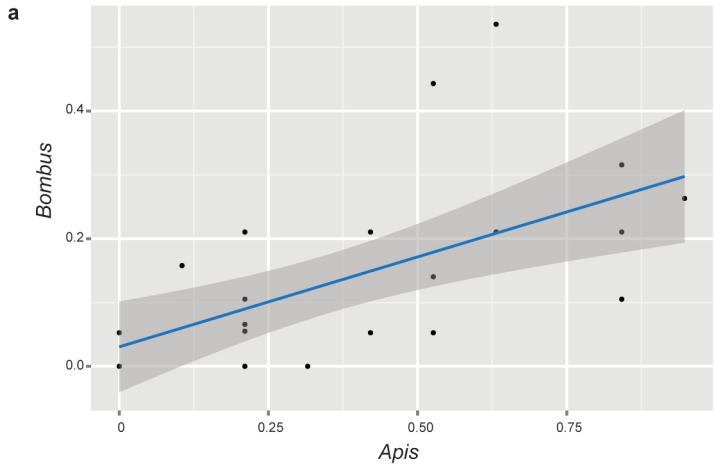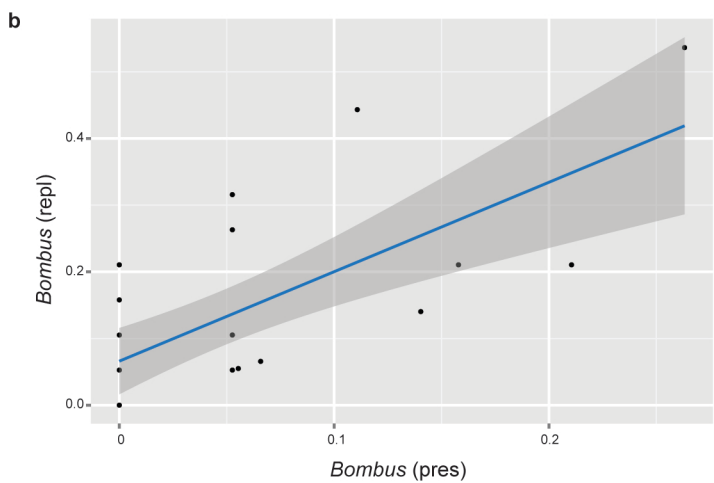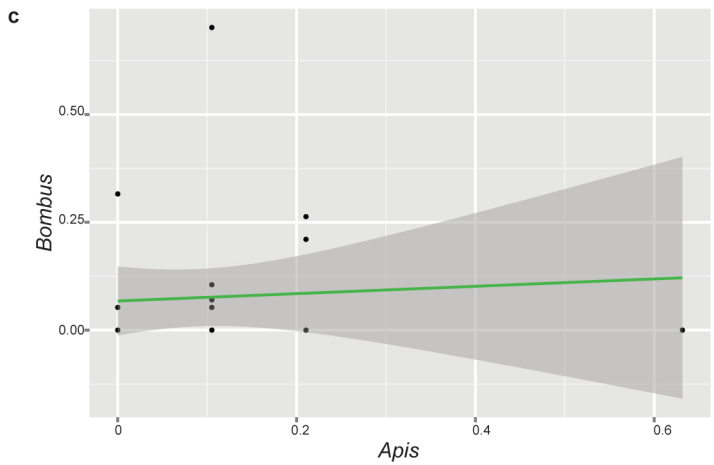

Supplement: NIHMS56161-supplement-Extended_data_figure_3.pdf [file NIHMS56161-supplement-Extended_data_figure_3.pdf]
